# Supplementary material for: Efficacy of Cryotherapy as a Primary Endoscopic Ablation Modality for Dysplastic Barrett’s Esophagus and Early Esophageal Neoplasia: A Systematic Review and Meta-Analysis
Source: PubMed Central journal article supplement — Cancer Control. 2020 Dec 9;27(1):1073274820976668. doi: 10.1177/1073274820976668 (PMC8480359; doi:10.1177/1073274820976668), 2020-12-09
Supplement: sj-pdf-2-ccx-10.1177_1073274820976668.pdf [file sj-pdf-2-ccx-10.1177_1073274820976668.pdf]

Appendix 1:

Ovid MEDLINE(R) Epub Ahead of Print, In-Process & Other Non-Indexed Citations, Ovid MEDLINE(R) Daily and Ovid MEDLINE(R) <1946 to Present>

| Search history sorted by search number ascending |                                                                                                                                                                                                                                                                                                                              |         |          |
|--------------------------------------------------|------------------------------------------------------------------------------------------------------------------------------------------------------------------------------------------------------------------------------------------------------------------------------------------------------------------------------|---------|----------|
|                                                  | Searches                                                                                                                                                                                                                                                                                                                     | Results | Type     |
| 1                                                | (barrett* adj3 (esophag* or oesophag*)).mp. [mp=title, abstract, original title, name of substance word, subject heading word, floating sub-heading word, keyword heading word, protocol supplementary concept word, rare disease supplementary concept word, unique identifier, synonyms]                                   | 9564    | Advanced |
| 2                                                | Barrett Esophagus/                                                                                                                                                                                                                                                                                                           | 7292    | Advanced |
| 3                                                | exp esophageal neoplasms/                                                                                                                                                                                                                                                                                                    | 46048   | Advanced |
| 4                                                | ((esophag* or oesophag*) adj3 (cancer* or carcinoma* or adenocarcinoma*)).mp. [mp=title, abstract, original title, name of substance word, subject heading word, floating sub-heading word, keyword heading word, protocol supplementary concept word, rare disease supplementary concept word, unique identifier, synonyms] | 41909   | Advanced |
| 5                                                | or/1-4                                                                                                                                                                                                                                                                                                                       | 60631   | Advanced |
| 6                                                | exp Cryotherapy/                                                                                                                                                                                                                                                                                                             | 23973   | Advanced |
| 7                                                | Cryosurgery/                                                                                                                                                                                                                                                                                                                 | 12158   | Advanced |
| 8                                                | (cryotherap* or cryosurg* or freez*).mp. [mp=title, abstract, original title, name of substance word, subject heading word, floating sub-heading word, keyword heading word, protocol supplementary concept word, rare disease supplementary concept word, unique identifier, synonyms]                                      | 101616  | Advanced |
| 9                                                | or/6-8                                                                                                                                                                                                                                                                                                                       | 120572  | Advanced |
| 10                                               | liquid <a href="#">nitrogen.mp.</a>                                                                                                                                                                                                                                                                                          | 7735    | Advanced |
| 11                                               | 9 or 10                                                                                                                                                                                                                                                                                                                      | 124815  | Advanced |
| 12                                               | 5 and 11                                                                                                                                                                                                                                                                                                                     | 1490    | Advanced |
| 13                                               | limit 12 to english language                                                                                                                                                                                                                                                                                                 | 1472    | Advanced |
| 14                                               | limit 13 to yr="2000 -Current"                                                                                                                                                                                                                                                                                               |         |          |

CENTRAL – 9

Embase <1988 to 2018 Week 28>

| Search history sorted by search number ascending |                                                                                                                                                                                                                                   |         |          |
|--------------------------------------------------|-----------------------------------------------------------------------------------------------------------------------------------------------------------------------------------------------------------------------------------|---------|----------|
| #                                                | Searches                                                                                                                                                                                                                          | Results | Type     |
| 1                                                | esophagus disease/ or exp barrett esophagus/ or exp esophagus tumor/                                                                                                                                                              | 78015   | Advanced |
| 2                                                | exp cryotherapy/                                                                                                                                                                                                                  | 25452   | Advanced |
| 3                                                | (cryoablat* or cryosurg* or cryother*).mp. [mp=title, abstract, heading word, drug trade name, original title, device manufacturer, drug manufacturer, device trade name, keyword, floating subheading word, candidate term word] | 28507   | Advanced |
| 4                                                | liquid nitrogen/                                                                                                                                                                                                                  | 6032    | Advanced |
| 5                                                | 1 and (2 or 3 or 4)                                                                                                                                                                                                               | 560     | Advanced |
| 6                                                | limit 5 to (human and english language and yr="2000 -Current")                                                                                                                                                                    | 513     | Advanced |
| 7                                                | 6 not case report/                                                                                                                                                                                                                | 469     | Advanced |
| 8                                                | remove duplicates from 7                                                                                                                                                                                                          | 462     |          |

Scopus

( TITLE-ABS-

KEY ( ( ( ( barrett\* W/2 ( esophag\* OR oesophag\* ) ) OR ( ( esophag\* OR oesophag\* ) W/3 ( cancer\* OR carcinoma\* OR adenocarcinoma\* ) ) ) ) ) AND ( "liquid nitrogen" OR cryoablat\* OR cryosurg\* OR cryother\* OR freez\* OR cryospray\* ) AND PUBYEAR > 1999 AND ( LIMIT-TO ( DOCTYPE , "ar " ) OR LIMIT-TO ( DOCTYPE , "re " ) ) AND ( LIMIT-TO ( LANGUAGE , "English " ) ) 654
