# Supplementary material for: Efficacy of Cryotherapy as a Primary Endoscopic Ablation Modality for Dysplastic Barrett’s Esophagus and Early Esophageal Neoplasia: A Systematic Review and Meta-Analysis
Source: PubMed Central journal article supplement — Cancer Control. 2020 Dec 9;27(1):1073274820976668. doi: 10.1177/1073274820976668 (PMC8480359; doi:10.1177/1073274820976668), 2020-12-09
Supplement: sj-pdf-3-ccx-10.1177_1073274820976668.pdf [file sj-pdf-3-ccx-10.1177_1073274820976668.pdf]

**Supplementary Table 1: Quality of Included Studies**

| Study name, year | Representation | Cohort Size | EMR before cryotherapy | Side effects | No. of cryotherapy sessions | Adequate Follow-up | Total |
|------------------|----------------|-------------|------------------------|--------------|-----------------------------|--------------------|-------|
| Canto 2015       | 0              | 0.5         | 1                      | 1            | 1                           | 1                  | 4.5   |
| Canto 2018       | 0              | 1           | 1                      | 1            | 0.5                         | 1                  | 4.5   |
| Cheng 2013       | 0              | 1           | 0                      | 0            | 0.5                         | 0                  | 1.5   |
| Eluri 2017       | 0.5            | 1           | 0                      | 1            | 0.5                         | 1                  | 4     |
| Goldberg 2012    | 0              | 0.5         | 0                      | 1            | 0.5                         | 1                  | 3     |
| Gosaine 2013     | 1              | 1           | 1                      | 1            | 1                           | 1                  | 6     |
| Greenwald 2010   | 0.5            | 1           | 0                      | 1            | 0.5                         | 0                  | 3     |
| Halsey 2011      | 0              | 1           | 0                      | 0            | 1                           | 1                  | 3     |
| Johnston 2013    | 0              | 0.5         | 0                      | 1            | 0                           | 0                  | 1.5   |
| Thota 2018       | 0              | 1           | 1                      | 0            | 0.5                         | 1                  | 3.5   |
| Verbeek 2015     | 0              | 0           | 1                      | 1            | 0.5                         | 0.5                | 3     |
| Wani 2012        | 0              | 0.5         | 1                      | 1            | 1                           | 0                  | 3.5   |
| Ramay 2017       | 0              | 1           | 1                      | 0.5          | 1                           | 1                  | 4.5   |
| Trindade 2017    | 0              | 1           | 1                      | 0.5          | 1                           | 1                  | 4.5   |

| Question                    | Scoring system                                                                                                                                                                              |
|-----------------------------|---------------------------------------------------------------------------------------------------------------------------------------------------------------------------------------------|
| Representative of community | 1 point = population-based studies<br>0.5 point = randomized controlled trial and/or multicenter studies<br>0 point for single-center hospital-based study                                  |
| Cohort size                 | 1 point = cohort size greater than 20 patients with Barrett's esophagus<br>0.5 point = cohort size 11-20 patients<br>0 point = cohort size 0-10 patients                                    |
| EMR before cryotherapy      | 1 point = yes<br>0 point = no/not reported                                                                                                                                                  |
| Side effects                | 1 point = side effects reported after cryotherapy<br>0 point = none/ not reported                                                                                                           |
| No. of cryotherapy sessions | 1 point = cohort required a minimum no. of cryotherapy sessions before outcomes were assessed<br>0.5 point = mean/median no. of cryotherapy sessions was reported<br>0 point = not reported |
| Adequacy of follow up       | 1 point = >80% of cohort was followed-up<br>0.5 point = 60%-79% of cohort was followed-up<br>0 point = <60% of cohort followed-up or follow-up not reported                                 |
