# Supplementary figures and images for: Efficacy of Cryotherapy as a Primary Endoscopic Ablation Modality for Dysplastic Barrett’s Esophagus and Early Esophageal Neoplasia: A Systematic Review and Meta-Analysis
Source: PubMed Central journal article supplement — Cancer Control. 2020 Dec 9;27(1):1073274820976668. doi: 10.1177/1073274820976668 (PMC8480359; doi:10.1177/1073274820976668), 2020-12-09

Supplementary Figure 1

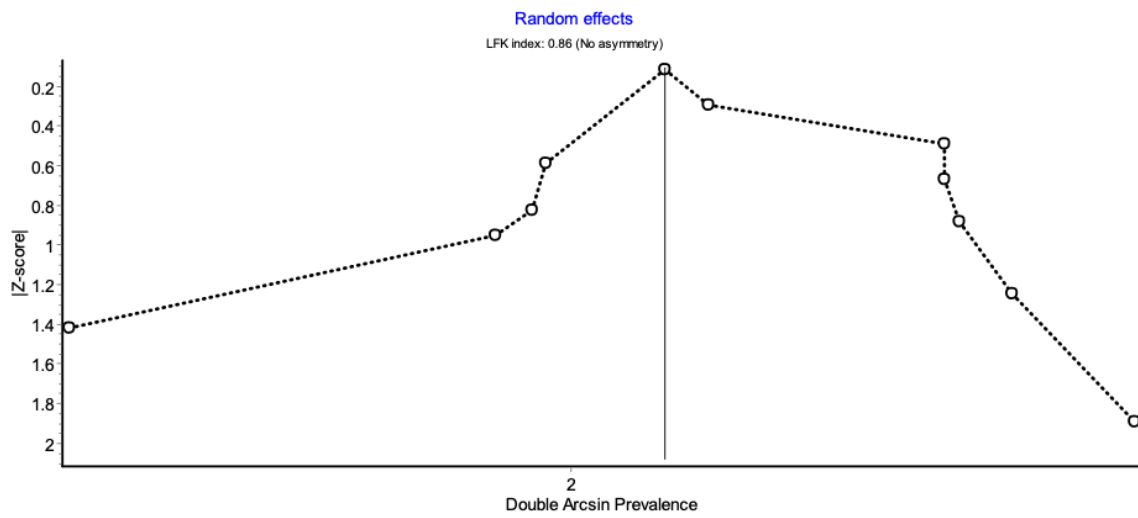

Supplementary Figure 2

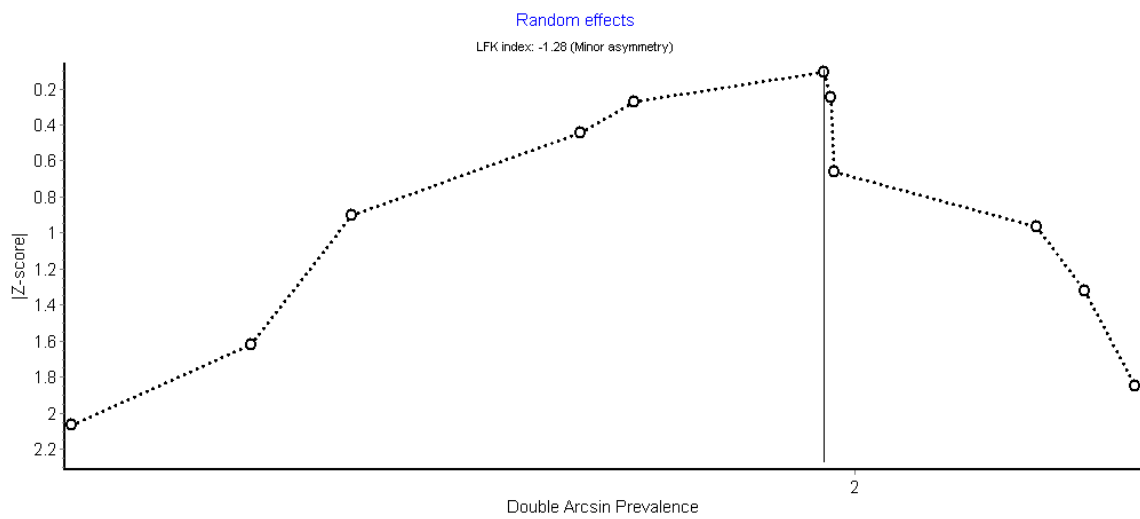

Supplement: sj-pdf-1-ccx-10.1177_1073274820976668.pdf [file sj-pdf-1-ccx-10.1177_1073274820976668.pdf]
